# Supplementary material for: Exploring the interplay between body mass index and passive muscle properties in relation to grip strength and jump performance in female university students
Source: PeerJ. 2024 Nov 13;12:e18430. doi: 10.7717/peerj.18430 (PMC11568817; doi:10.7717/peerj.18430)
Supplement: Supplemental Information 1 — Each data point indicates the average performance of 136 female student. We evaluate the relationship between body composition, the mechanical properties of the muscle and performance in strength tests. [file peerj-12-18430-s001.xlsx]

## Sheet: Original database
												grip strength
												Rigth			Left			countermovement jump					palmaris longus						flexor digitorum superficialis						Right Achilles Tendon						Left Achilles Tendon
							Code	Age	height	weight	BMI	GS R1	GS R2	GS R3	GS L1	GS L2	GS L3	Force[N]	Time [s]	Power [w]	velocty[m/s]	height[m]	Tone	stiffness	Decrement	Elasticity	Relaxation	deborah number	Tone	stiffness	Decrement	Elasticity	Relaxation	deborah number	F	S	D	E	R	C	F	S	D	R	C	18. TBW (Total Body Water)	19. Lower Limit (TBW Normal Range)	20. Upper Limit (TBW Normal Range)	21. Protein
							1	18	162	51	19.433	18	19	20	18	14	16	1194	0.44	329	2.132	0.232	17.18	326	1.12	0.892857	14.7	0.89	17.18	321	1.13	0.884956	15.8	0.97	29.05	776	0.75	1.33333	6.6	0.44	27.48	717	0.73	7.3	0.48	29	28.7	35.1	7.8
							2	19	156	64.5	26.5039	28	27	26	26	22	24	1447	0.32	242.8	1.573	0.126	14.22	251	1.45	0.689655	19.5	1.17	14.9	269	1.45	0.689655	18.6	1.13	29.69	729	1.21	0.826446	6.8	0.45	29.48	708	1.15	7	0.46	29.8	26.6	32.6	8
							3	18	169	89	31.1614	26	25	24	24	24	24	1600	0.38	344.9	1.881	0.181	13.68	189	1.14	0.877193	21.9	1.21	15.32	285	1.41	0.70922	18.8	1.15	27.35	673	0.86	1.16279	7.6	0.5	26.21	639	0.88	8	0.53	38	31.3	38.3	10.2
							4	18	164	65.5	24.3531	20	19	18	2	10	6	1138	0.38	167.6	1.878	0.18	16.34	291	1.25	0.8	17	1.02	18.65	336	1.42	0.704225	15.7	0.97	33.82	885	0.73	1.36986	5.7	0.38	32.27	831	0.63	6	0.4	29.9	29.4	36	8
	codebook						5	19	160	45.5	17.7734	10	13	16	12	16	14	1073	0.4	230	1.979	0.2	13.86	242	1.29	0.775194	19	1.11	15.11	282	1.4	0.714286	17.5	1.05	25.29	585	0.83	1.20482	9	0.57	26.83	665	0.75	8	0.52	26.4	28	34.2	7.1
	GS R1	grip strength right hand 1					6	18	158	62.5	25.0361	26	24	22	22	18	20	786	0.42	399.1	2.081	0.221	16.32	292	1.29	0.775194	16.6	1.01	18.06	317	1.62	0.617284	15.9	0.97	30.8	855	0.79	1.26582	5.9	0.4	26.36	690	0.76	7.5	0.49	29.5	27.4	33.4	8
	GS R2	grip strength right hand 2					7	20	162	66.5	25.3391	20	19	18	16	12	14	909	0.33	195.8	1.627	0.135	11.88	188	1.32	0.757576	21.6	1.16	14.19	252	1.19	0.840336	18.8	1.11	31.96	783	0.83	1.20482	6.4	0.41	30.9	789	0.73	6.5	0.43	31.1	28.7	35.1	8.3
	GS R3	grip strength right hand 3					8	20	158	63	25.2363	18	20	22	20	18	19	960	0.37	282.55	1.831	0.171	15.35	259	1.08	0.925926	17.5	1.02	18.25	357	1.27	0.787402	14.4	0.89	31.86	820	0.64	1.5625	6.2	0.42	32.64	824	0.66	6.1	0.41	30.1	27.4	33.4	8
	GS L1	grip strength left hand 1					9	21	163	76.5	28.793	30	26	22	30	20	25	1355	0.37	218.7	1.827	0.17	15.48	256	1.11	0.900901	18.9	1.12	18.56	354	1.24	0.806452	15.2	0.95	33.65	884	0.72	1.38889	5.6	0.38	33.65	891	0.79	5.6	0.38	38.1	28.7	35.1	10.4
	GS L2	grip strength left hand 2					10	20	152	70	30.2978	20	23	26	22	22	22	1340	0.36	222.1	1.776	0.161	14.71	246	1.15	0.869565	19	1.12	14.71	284	1.5	0.666667	17.5	1.06	31.34	938	0.5	2	5.5	0.37	34.41	940	0.64	5.3	0.36	31.3	25.3	30.9	8.4
	GS L3	grip strength left hand 3					11	19	167	58.5	20.976	18	16	14	12	16	14	1044	0.35	163.4	1.726	0.152	16.1	288	1.16	0.862069	16.8	1.02	17.85	308	1.37	0.729927	16.5	1.01	29.62	676	0.84	1.19048	7.5	0.49	28.26	681	0.75	7.5	0.49	28.9	30.5	37.3	7.7
	TBW	Total Body Water					12	21	163	63.5	23.9	22	23	24	22	24	23	1427	0.35	274.4	1.726	0.152	14.61	274	0.98	1.02041	16.7	0.97	17.9	338	1.09	0.917431	15.1	0.92	32.87	876	0.53	1.88679	5.9	0.39	31.9	829	0.64	6.1	0.41	31.2	28.7	35.1	8.5
	BFM	Body Fat Mass					13	20	160	77	30.0781	36	33	30	32	28	30	1545	0.38	344.9	1.878	0.18	14.12	265	1.3	0.769231	18.1	1.07	18.28	334	1.73	0.578035	15.6	0.96	39.25	1087	0.49	2.04082	4.6	0.32	34.13	926	0.69	5.4	0.37	32.6	28	34.2	8.8
	FFM	Fat Free Mass					14	19	166	104.5	37.9228	28	28	28	26	26	26	2160	0.27	242.8	1.32	0.089	13.84	234	1.5	0.666667	20.2	1.2	16.61	283	1.7	0.588235	18.2	1.11	31.02	809	0.78	1.28205	6.1	0.41	32.28	894	0.58	5.8	0.39	37.4	30.1	36.8	10.2
	SMM	Skeletal Muscle Mass					15	19	157	62.5	25.356	22	22	22	20	24	22	1345	0.34	233.6	1.678	0.144	13.9	242	1.38	0.724638	19.6	1.15	17.18	281	1.68	0.595238	18.4	1.12	32.52	826	0.78	1.28205	6	0.41	31.46	769	0.8	6.5	0.43	28.2	27	33	7.6
	BMI	Body Mass Index					16	18	152	66	28.5665	22	22	22	16	18	17	972	0.32	283.5	1.576	0.127	14	223	1.37	0.729927	20.5	1.2	17.57	277	2.01	0.497512	17.5	1.05	28.77	786	0.7	1.42857	6.5	0.44	27.33	688	0.86	7.6	0.5	27.2	25.3	30.9	7.3
	PBF	Percent Body Fat					17	21	163	78	29.3575	30	28	26	26	22	24	972	0.33	231.4	1.627	0.135	14.66	260	1.14	0.877193	18.6	1.11	15.06	302	1.3	0.769231	17.2	1.06	31.07	913	0.44	2.27273	5.6	0.38	31.55	821	0.73	6.1	0.41	36.1	29.1	35.5	9.7
							18	18	157	59.5	24.1389	30	26	22	26	18	22	1650	0.44	479.3	2.132	0.232	15.54	284	1.12	0.892857	16.9	1.02	16.22	298	1.23	0.813008	16.7	1.01	30.8	783	0.95	1.05263	6.5	0.44	31.09	809	1.02	6.1	0.41	29.9	27	33	8
							19	18	165	101	37.0983	24	21	18	20	12	16	2454	0.25	212.7	1.218	0.076	13.22	226	1.25	0.8	21.8	1.3	13.61	237	1.43	0.699301	21.6	1.3	29.33	778	0.74	1.35135	6.6	0.45	29.9	767	0.84	6.6	0.45	39.5	29.8	36.4	10.8
							20	18	165	78	28.6501	18	17	16	18	12	15	1280	0.31	143.1	1.523	0.118	13.26	219	1.13	0.884956	20.5	1.17	17.38	297	1.36	0.735294	17.3	1.06	31.21	745	0.89	1.1236	6.8	0.45	31.03	752	0.98	6.6	0.44	32.5	29.4	36	8.8
							21	20	163	60	22.5827	30	30	30	30	30	30	1301	0.4	366.7	1.983	0.201	16.76	288	0.87	1.14943	16.5	1	17.82	394	1.41	0.70922	12.8	0.8	32.46	796	0.83	1.20482	6.4	0.43	31.39	782	0.85	6.5	0.43	32.7	29.1	35.5	8.9
							22	21	157	71.5	29.0073	32	29	26	28	28	28	1505	0.31	224.2	1.525	0.119	14.47	251	1.14	0.877193	18.9	1.12	14.75	292	1.24	0.806452	17.3	1.05	28.82	722	0.73	1.36986	7.1	0.47	29.2	733	0.65	7	0.47	30.8	27	33	8.3
							23	18	177	58	18.5132	30	31	32	30	26	28	920	0.41	549.4	2.03	0.21	14.1	249	1.24	0.806452	19	1.12	16.02	288	1.06	0.943396	17.7	1.08	29.84	760	0.93	1.07527	6.6	0.44	30.32	779	0.79	6.7	0.45	32	30.9	37.7	8.5
							24	19	157	62.5	25.356	30	28	26	26	24	25	1266	0.37	243.6	1.827	0.17	13.7	231	0.94	1.06383	19.4	1.13	16.1	311	1.18	0.847458	15.7	0.96	28.24	719	0.78	1.28205	7.3	0.49	29.2	758	0.61	6.8	0.45	28.8	27	33	7.8
							25	20	156	51	20.9566	12	12	12	12	14	13	744	0.34	223.2	1.678	0.144	17.58	311	1.35	0.740741	15.7	0.95	17.97	290	1.36	0.735294	17.4	1.05	32.06	766	0.75	1.33333	6.6	0.44	32.15	825	0.66	6.2	0.42	24.8	26.6	32.6	6.7
							26	18	164	70	26.0262	28	26	24	22	20	21	1226	0.32	140	1.576	0.127	15.38	270	1.36	0.735294	18.5	1.12	15.28	285	1.49	0.671141	17.9	1.09	37.01	1023	0.45	2.22222	5	0.34	31.63	769	0.77	6.7	0.44	29.9	29.4	36	8.1
							27	20	165	70	25.7117	20	19	18	12	14	13	954	0.27	nn	1.322	0.089	15.55	264	1.18	0.847458	18	1.06	16.03	300	1.36	0.735294	16.6	1.01	33.31	891	0.67	1.49254	5.6	0.38	31.67	820	0.96	6	0.4	33.6	29.8	36.4	9
							28	22	163	61.5	23.1473	22	21	20	22	20	21	1300	0.38	273.2	1.878	0.18	14.82	261	1.38	0.724638	18.5	1.09	15.5	305	1.63	0.613497	16.5	1	28.95	728	0.89	1.1236	7	0.46	27.89	700	0.84	7.4	0.48	29.3	29.1	35.5	7.8
							29	24	158	72	28.8415	20	19	18	18	16	17	1464	0.36	296.9	1.78	0.162	12.89	195	1.26	0.793651	22.7	1.28	13.37	287	1.71	0.584795	18.9	1.15	33.75	836	0.76	1.31579	6.1	0.41	33.36	836	0.71	6	0.4	31.4	27.4	33.4	8.6
							30	20	164	75	27.8852	16	16	16	12	14	13	1284	0.31	152.8	1.525	0.119	12.79	222	1.62	0.617284	21.5	1.25	13.56	235	1.27	0.787402	19.9	1.15	29.52	742	0.96	1.04167	6.9	0.46	32.3	737	1.07	6.9	0.46	31.2	29.4	36	8.3
							31	19	155	50.5	21.0198	20	18	16	18	16	17	850	0.33	104.5	1.627	0.135	13.45	239	1.27	0.787402	19.5	1.14	14.61	258	1.09	0.917431	19.3	1.17	29.01	729	0.72	1.38889	7	0.46	30.06	788	0.64	6.5	0.43	23.7	26.3	32.1	6.3
							32	20	151	51.5	22.5867	12	13	14	10	12	11	1262	0.38	289.9	1.881	0.181	16.74	289	0.89	1.1236	16.6	0.99	18.67	353	1.4	0.714286	14.7	0.91	29.39	732	0.98	1.02041	7	0.46	31.03	781	0.9	6.6	0.44	26.5	24.9	30.5	7.1
							33	19	156	65	26.7094	28	24	20	22	22	22	1493	0.36	309.4	1.776	0.161	15.59	284	1.17	0.854701	17.2	1.03	17.7	282	1.5	0.666667	17.7	1.07	31.57	776	0.77	1.2987	6.5	0.43	30.48	771	0.79	6.6	0.44	29.2	26.6	32.6	7.9
							34	18	169	78	27.31	30	27	24	28	24	26	1711	0.45	484.6	2.182	0.243	15.54	290	1.17	0.854701	17	1.03	17.26	332	1.29	0.775194	15.8	0.98	34.16	920	0.68	1.47059	5.5	0.38	33.86	872	0.85	5.7	0.39	36.9	31.3	38.3	10.1
							35	18	157	78.5	31.8471	26	25	24	24	20	22	1670	0.35	344.1	1.726	0.152	13.13	172	1.04	0.961538	22.1	1.15	14.96	269	1.16	0.862069	19.2	1.16	28.39	706	0.98	1.02041	7.3	0.48	30.51	811	0.86	6.3	0.43	33.5	27	33	8.9
							36	18	157	59	23.9361	10	7	4	8	10	9	1810	0.3	309	1.475	0.111	15.05	297	1.08	0.925926	15.9	0.96	18.53	350	1.04	0.961538	14.6	0.91	31.75	776	1.02	0.980392	6.3	0.42	32.61	801	0.82	6.3	0.42	27.4	27	33	7.4
							37	26	159	44	17.4044	22	21	20	20	18	19	1092	0.32	187.7	1.573	0.126	16.22	294	0.99	1.0101	16.1	0.96	16.32	334	1.31	0.763359	14.9	0.91	29.84	729	0.85	1.17647	7	0.46	32.15	775	0.99	6.4	0.43	24.6	27.7	33.9	6.5
							38	21	152	48.5	20.992	20	20	20	20	20	20	976	0.33	142.4	1.627	0.135	17.2	342	1.05	0.952381	14.1	0.85	16.43	327	1.24	0.806452	15.8	0.97	31.19	828	0.63	1.5873	6.2	0.42	31.28	854	0.6	6	0.4	24.4	25.3	30.9	6.6
							39	22	159	90	35.5999	22	20	18	20	16	18	1600	0.26	184	1.269	0.082	15.45	227	1.59	0.628931	21.8	1.3	14.28	227	1.51	0.662252	22.1	1.32	26.15	679	0.73	1.36986	7.5	0.49	28.47	749	0.82	6.9	0.46	31.3	27.7	33.9	8.3
							40	20	163	75.5	28.4166	26	25	24	24	20	22	1375	0.33	203.5	1.627	0.135	14.99	290	1.25	0.8	17.6	1.08	15.57	285	1.64	0.609756	17.9	1.09	31.12	786	0.59	1.69492	6.5	0.43	30.07	725	0.88	7	0.46	28.2	29.1	35.5	7.4
							41	19	161	60	23.1473	20	21	22	16	16	16	632	0.28	175.4	1.37	0.096	12.75	202	1.24	0.806452	22.9	1.31	13.81	261	1.44	0.694444	18.9	1.13	30.22	742	0.76	1.31579	6.9	0.45	29.35	723	0.64	7.9	0.52	26.7	28.4	34.7	7.2
							42	20	148	39	17.805	20	19	18	20	18	19	780	0.37	133.9	1.831	0.171	15.67	257	1.13	0.884956	18.4	1.09	15.1	263	1.29	0.775194	18.3	1.09	30.19	703	0.82	1.21951	7.4	0.48	29.34	682	0.89	7.1	0.46	21.5	24	29.4	5.8
							43	19	169	58.5	20.4825	28	28	28	26	22	24	1340	0.4	314	1.983	0.201	15.74	307	1.12	0.892857	16.1	0.97	16.43	274	1.26	0.793651	17.6	1.05	33.41	863	0.75	1.33333	5.9	0.4	32.35	850	0.59	7.7	0.5	31.8	31.7	38.7	8.5
							44	18	166	70	25.4028	34	33	32	30	28	29	1265	0.41	273	2.03	0.21	14.22	232	1.2	0.833333	21.2	1.25	16.34	301	1.36	0.735294	17.1	1.04	31.22	809	0.78	1.28205	6.2	0.41	31.41	801	0.81	6	0.4	33.5	30.1	36.8	9
							45	19	158	68.5	27.4395	28	26	24	26	30	28	1288	0.37	330.7	1.827	0.17	14.28	248	1.09	0.917431	18.2	1.04	16.5	271	1.06	0.943396	18.1	1.09	26.83	667	1.17	0.854701	7.6	0.5	30.01	714	1.12	6.3	0.42	31.6	27.4	33.4	8.6
							46	20	166	104	37.7413	4	7	10	2	4	3	2454	0.34	440	1.675	0.143	13.9	213	1.36	0.735294	20.9	1.18	15.15	244	1.26	0.793651	19.8	1.18	34.95	1009	0.59	1.69492	4.8	0.33	33.1	868	0.63	7	0.47	43.3	30.1	36.8	11.8
							47	21	169	81.5	28.5354	16	17	18	24	18	21	1705	0.4	393.5	1.983	201	13.97	255	1.15	0.869565	19	1.14	15.6	337	1.38	0.724638	15.4	0.96	32.46	843	0.74	1.35135	5.9	0.39	34.45	892	0.71	5.8	0.39	36.7	31.3	38.3	10
							48	22	156	62.5	25.6821	12	10	8	4	10	7	1270	0.44	267.6	2.132	0.232	16.89	318	1.33	0.75188	15.7	0.96	16.31	348	1.58	0.632911	14.8	0.92	29.43	773	0.68	1.47059	7	0.47	30.01	785	0.87	7.1	0.47	30.4	26.6	32.6	8.2
							49	18	154	62.5	26.3535	8	9	10	14	12	13	1740	0.3	294.7	1.472	0.111	14.79	271	1.23	0.813008	18.1	1.06	16.82	294	1.42	0.704225	16.7	1.01	31.81	836	0.64	1.5625	6.1	0.41	29.09	738	0.7	5.5	0.37	27.5	26	31.8	7.3
							50	19	172	96	32.45	32	31	30	26	24	25	1770	0.39	383	1.929	0.19	13.93	245	1.54	0.649351	20.4	1.22	15.94	291	1.62	0.617284	18.5	1.14	30.07	739	0.82	1.21951	6.8	0.45	31.38	790	0.63	6.6	0.45	40	32.4	39.6	10.7
							51	19	177	84.5	26.9718	28	26	24	30	30	30	1955	0.35	378	1.729	0.152	13.34	216	1.29	0.775194	20.9	1.19	13.44	261	1.6	0.625	18.8	1.11	30.07	796	0.78	1.28205	6.4	0.42	31.23	902	0.77	6.4	0.43	37	34.3	41.9	10
							52	18	158	74	29.6427	18	16	14	16	20	18	1280	0.3	143.5	1.475	0.111	13.42	232	1.72	0.581395	20.1	1.17	16.31	253	1.54	0.649351	19.5	1.17	29.53	801	0.86	1.16279	6.3	0.42	31.65	870	0.8	5.8	0.4	31.6	27.4	33.4	8.6
							53	22	156	69.5	28.5585	20	20	20	20	20	20	1349	0.36	202.1	1.776	0.161	14.13	262	1.47	0.680272	18.5	1.1	18.64	330	1.61	0.621118	15.8	0.98	30.17	727	0.78	1.28205	7	0.46	31.03	782	0.83	5.8	0.39	30.7	26.6	32.6	8.3
							54	18	157	54	21.9076	22	21	20	18	16	17	1016	0.4	208.4	1.979	0.2	13.46	224	1.07	0.934579	19.3	1.11	14.61	274	1.19	0.840336	18.1	1.08	30.09	744	0.78	1.28205	7	0.46	31.7	760	0.83	6.1	0.41	28	27	33	7.5
							55	18	156	64	26.2985	20	21	22	22	18	20	1295	0.4	269.4	1.983	0.201	14.82	244	1.18	0.847458	18.8	1.09	17.13	302	1.49	0.671141	16.9	1.03	31.93	837	0.68	1.47059	6.2	0.42	31.93	822	0.75	5.9	0.4	31.7	26.6	32.6	8.6
							56	32	161	82	31.6346	44	41	38	36	22	29	2045	0.41	479.8	2.03	0.21	16.29	299	1.13	0.884956	16.9	1.03	22.17	441	1.22	0.819672	12.2	0.78	29.38	757	0.91	1.0989	6.5	0.43	29.88	807	0.83	6.8	0.45	39.4	28.7	35.1	10.7
							57	26	160	51.5	20.1172	30	28	26	24	24	24	1035	0.38	234.6	1.878	0.18	15.46	266	1.1	0.909091	17.5	1.04	17.78	304	1.31	0.763359	16.6	1.01	30.22	699	0.87	1.14943	7.1	0.46	28.87	720	0.72	6.3	0.42	26.2	28	34.2	7.1
							58	20	161	63	24.3046	34	32	30	30	32	31	1582	0.48	440.9	2.335	0.278	15.65	285	0.98	1.02041	16.2	0.96	19.32	361	1.71	0.584795	14.1	0.87	29.38	716	0.78	1.28205	7.3	0.48	31.28	760	0.93	7.2	0.47	37.3	28.4	34.7	10.2
							59	19	168	76	26.9274	20	21	22	16	16	16	1656	0.34	271.3	1.678	0.144	15.83	283	1.08	0.925926	17.7	1.08	17.85	310	1.38	0.724638	16.5	1.02	33	823	0.8	1.25	6	0.41	33.19	831	0.81	6.7	0.45	34.4	30.9	37.7	9.2
							60	28	162	62.5	23.815	22	21	20	20	22	21	1420	0.41	216.4	2.03	0.21	14.17	245	1.17	0.854701	18.8	1.12	15.33	327	1.27	0.787402	15	0.93	32.86	860	0.65	1.53846	6	0.41	31.61	837	0.58	5.9	0.4	29.8	28.7	35.1	8
							61	19	167	79	28.3266	30	27	24	24	20	22	1590	0.3	229.4	1.472	0.111	14.58	261	1.31	0.763359	18.2	1.08	15.55	277	1.36	0.735294	18.2	1.1	29.64	779	0.94	1.06383	6.4	0.43	29.84	780	1.1	6.1	0.41	34.4	30.5	37.3	9.2
							62	21	157	65	26.3702	24	24	24	20	20	20	1300	0.34	222.6	1.678	0.144	14.6	267	1.34	0.746269	18.6	1.11	16.13	306	1.39	0.719424	17.1	1.05	32.26	814	0.73	1.36986	6.1	0.41	33.53	823	0.74	6.8	0.45	28.7	27	33	7.8
							63	19	154	65	27.4077	18	17	16	10	18	14	1452	0.38	316.7	1.881	0.181	13.21	212	0.97	1.03093	21.3	1.23	14.66	263	1.19	0.840336	18.9	1.14	31.83	801	0.74	1.35135	6.5	0.44	30.68	751	0.8	6.4	0.43	29.3	26	31.8	7.9
							64	18	150	53.5	23.7778	24	25	26	24	20	22	1118	0.38	220	1.878	0.18	14.27	233	0.93	1.07527	18	1	17.26	305	1.3	0.769231	16.2	0.99	30.74	806	0.67	1.49254	6.3	0.42	30.17	787	0.74	6.2	0.41	26	24.7	30.1	7.1
							65	21	166	75	27.2173	30	30	30	30	24	27	1766	0.33	308	1.624	0.135	14.18	247	1.31	0.763359	19	1.12	18.32	331	1.41	0.70922	15.8	0.98	30.1	722	0.88	1.13636	7	0.46	30.55	728	0.74	6.4	0.43	32.5	30.1	36.8	8.8
							66	24	163	71	26.7229	20	23	26	22	22	22	1530	0.4	344.9	1.983	0.201	13.83	261	1.19	0.840336	17.5	1.01	15.18	245	1.32	0.757576	19.6	1.16	30.84	821	0.9	1.11111	6.1	0.41	30.84	830	0.78	7	0.46	34.6	29.1	35.5	9.3
							67	18	150	54	24	30	29	28	24	24	24	1184	0.37	241.7	1.827	0.17	17.47	322	0.96	1.04167	15.4	0.94	19.2	377	1.42	0.704225	13.6	0.85	28.85	697	0.75	1.33333	7.3	0.48	28.85	667	0.78	6.1	0.41	25.9	24.7	30.1	7
							68	18	158	45.5	18.2262	20	19	18	16	16	16	964	0.39	231.2	1.932	0.19	13.55	212	1.07	0.934579	20.2	1.15	13.75	249	1.29	0.775194	19.1	1.12	28.91	690	0.78	1.28205	7.4	0.49	30.45	730	0.78	7.8	0.51	25.5	27.4	33.4	6.9
							69	21	157	75	30.4272	24	23	22	20	18	19	1995	0.32	427.5	1.576	0.127	13.53	231	1.31	0.763359	20.3	1.18	14.98	265	1.56	0.641026	18.9	1.13	30.8	751	0.9	1.11111	6.7	0.44	32.35	826	0.88	7.1	0.47	31.7	27	33	8.6
							70	21	151	62	27.1918	26	27	28	24	22	23	1248	0.25	126.8	1.218	0.076	16.13	282	1.25	0.8	17.1	1.03	18.15	319	1.68	0.595238	16.4	1.02	33.31	831	0.87	1.14943	6.2	0.42	32.44	815	0.76	6.1	0.41	27.9	24.9	30.5	7.4
							71	19	161	49.5	19.0965	24	23	22	22	24	23	906	0.41	29.81	2.03	0.21	16.63	298	1.15	0.869565	16.3	0.98	15.86	270	1.2	0.833333	17.5	1.03	27.18	616	1.14	0.877193	8.4	0.55	28.62	637	1.15	6.2	0.42	29.5	28.4	34.7	7.9
							72	19	163	74	27.852	22	22	22	18	22	20	1268	0.33	196.3	1.624	0.135	13.92	233	1.26	0.793651	20.3	1.19	15.65	269	1.71	0.584795	18.6	1.13	30.64	737	1.01	0.990099	6.8	0.45	32.57	778	1.01	8.1	0.53	31.3	29.1	35.5	8.4
							73	18	165	78.5	28.8338	28	27	26	26	22	24	1495	0.36	237.3	1.763	0.158	13.26	202	0.92	1.08696	21.2	1.21	14.13	253	1.33	0.75188	18.9	1.12	30.07	791	0.95	1.05263	6.4	0.43	29.97	766	1.1	6.3	0.42	33.4	29.8	36.4	9
							74	20	163	70	26.3465	28	25	22	20	20	20	1462	0.32	232.3	1.573	0.126	11.42	161	1.48	0.675676	22	1.09	12	176	1.24	0.806452	20.3	1.04	32.41	780	0.98	1.02041	6.4	0.43	32.81	777	0.95	6.5	0.43	28.5	29.1	35.5	7.7
							75	18	155	66	27.4714	30	25	20	18	16	17	1718	0.37	403.6	1.831	0.171	14.71	244	1.1	0.909091	19.1	1.12	15.96	272	1.1	0.909091	18.1	1.08	32.3	839	0.76	1.31579	6	0.4	32.68	819	0.78	6.2	0.41	29.8	26.3	32.1	8
							76	19	166	70.5	25.5843	18	21	24	24	22	23	1536	0.39	314.2	1.929	0.19	15.21	248	1.04	0.961538	19.2	1.14	14.92	270	1.18	0.847458	18.9	1.14	30.32	804	0.76	1.31579	6.4	0.43	31.19	836	0.75	6.4	0.43	35.2	30.5	37.3	9.4
							77	19	158	54.5	21.8314	20	20	20	18	18	18	1120	0.4	227.3	1.983	0.201	14.67	283	1.47	0.680272	18	1.12	15.73	311	1.37	0.729927	16.7	1.03	31.17	764	0.79	1.26582	6.7	0.45	32.51	788	0.77	6	0.4	26.4	27.4	33.4	7.2
							78	18	155	64	26.6389	20	20	20	20	18	19	1305	0.37	251.5	1.827	0.17	15.43	277	1.21	0.826446	17.7	1.08	16.67	285	1.32	0.757576	17	1.02	29.28	699	1.14	0.877193	7.2	0.48	30.73	722	1.34	6.5	0.43	29.6	26.3	32.1	8
							79	20	164	74	27.5134	26	24	22	26	22	24	1352	0.33	184.7	1.624	0.135	14.76	253	1.15	0.869565	19.2	1.15	15.54	301	1.26	0.793651	17.8	1.1	29.24	747	0.96	1.04167	6.7	0.45	30.59	757	0.98	6.9	0.46	33	29.4	36	8.9
							80	20	155	54	22.4766	24	22	20	20	22	21	1219	0.34	197.6	1.675	0.143	16.3	275	0.96	1.04167	17.5	1.06	19.08	396	1.1	0.909091	12.8	0.8	28.24	706	1	1	7.2	0.48	28.21	720	0.97	6.5	0.43	27.4	26.3	32.1	7.4
							81	19	166	55	19.9594	22	21	20	26	22	24	1116	0.44	236.5	2.132	0.232	15.86	289	1.11	0.900901	16.7	0.99	18.55	320	1.39	0.719424	15.9	0.97	29.42	692	0.96	1.04167	7.5	0.49	29.97	698	1.05	7.1	0.48	30.1	30.1	36.8	8.1
							82	19	162	95	36.1988	9	12	16	12	22	17	2410	0.32	432.8	1.576	0.127	15.57	276	1.25	0.8	18.3	1.09	18.18	328	1.4	0.714286	15.5	0.94	35.29	982	0.77	1.2987	5	0.34	34.02	895	0.73	7.2	0.47	37.4	28.7	35.1	10.2
							83	23	155	63.5	26.4308	23	20	18	22	18	20	738	0.34	449.8	1.678	0.144	14.78	264	1.63	0.613497	19.8	1.2	15.75	270	1.65	0.606061	19.8	1.2	30.15	706	0.86	1.16279	7.2	0.47	29.48	674	0.96	5.6	0.38	26.6	26.3	32.1	7.2
							84	18	164	91.5	34.0199	22	23	24	28	24	26	1209	0.32	283.5	1.576	0.127	15.16	272	1.48	0.675676	18.9	1.14	17.77	333	1.3	0.769231	16.1	1	32.64	890	0.52	1.92308	5.7	0.38	32.15	785	0.78	7.6	0.5	35.9	29.8	36.4	9.7
							85	20	157	72.5	29.413	22	23	24	24	18	21	1204	0.35	178.4	1.726	0.152	14.49	261	1.16	0.862069	18.7	1.11	16.14	304	1.18	0.847458	16.8	1.03	30.34	764	0.7	1.42857	6.8	0.45	33.41	835	0.78	6.4	0.42	29.9	27	33	8.1
							86	19	150	62	27.5556	22	24	26	24	24	24	1480	0.37	322.3	1.827	0.17	13.41	217	1.17	0.854701	21.9	1.3	12.54	216	1.29	0.775194	22.5	1.32	32.12	768	0.75	1.33333	6.6	0.44	30.1	786	0.79	6	0.4	27.8	24.7	30.1	7.5
							87	19	164	89.5	33.2763	24	23	22	22	20	21	1642	0.35	250.8	1.726	0.152	12.89	203	1.31	0.763359	22.7	1.32	14.62	253	1.37	0.729927	20.5	1.24	25.75	653	1	1	7.7	0.5	23.65	625	1.05	5	0.34	36.6	29.4	36	9.9
							88	19	164	51	18.9619	22	23	24	22	20	21	914	0.33	122.5	1.624	0.135	16.82	307	0.98	1.02041	15.4	0.92	16.34	334	1.2	0.833333	15	0.92	27.38	712	0.76	1.31579	7.3	0.48	27.09	732	0.91	6.9	0.45	28.7	29.4	36	7.6
							89	18	158	53	21.2306	12	13	14	14	14	14	1145	0.33	183.9	1.624	0.135	13.61	231	1.18	0.847458	19.1	1.1	14.86	275	1.29	0.775194	17.5	1.06	29.42	729	0.77	1.2987	7.2	0.48	36.66	979	0.52	6.5	0.44	25.5	27.4	33.4	6.8
							90	22	148	57	26.0226	26	23	20	20	12	16	1282	0.43	314.1	2.085	0.222	14.54	247	0.96	1.04167	19	1.14	16.27	290	1.01	0.990099	17.3	1.04	34.17	887	0.68	1.47059	5.7	0.38	30.9	745	0.83	8.4	0.55	25.9	24	29.4	7
							91	19	162	68.5	26.1012	22	23	24	22	18	20	1285	0.36	225.6	1.78	0.162	14.08	235	1.19	0.840336	19.9	1.19	15.92	289	1.42	0.704225	18	1.1	32.61	830	0.65	1.53846	6.1	0.41	31.45	797	0.69	6.5	0.44	30.7	28.7	35.1	8.2
							92	18	158	74	29.6427	28	25	22	28	26	27	1268	0.38	220.6	1.69	0.22	15.57	236	1.58	0.632911	20.6	1.22	15.28	248	1.4	0.714286	20.5	1.23	31.51	818	0.87	1.14943	6.1	0.41	31.4	838	0.89	7.1	0.47	30.6	27.4	33.4	8.1
							93	19	171	70	23.939	38	35	32	38	36	37	1468	0.38	290.6	1.878	0.18	13.55	232	1.19	0.840336	19.4	1.13	13.55	288	1.42	0.704225	17.5	1.05	31.51	821	0.71	1.40845	6.2	0.42	32.08	824	0.81	6	0.4	34.1	32	39.2	9.2
							94	21	160	133	51.9531	30	29	28	34	28	31	2820	0.27	385.5	1.32	0.089	15.46	233	1.35	0.740741	20.7	1.23	13.81	234	1.46	0.684932	21.8	1.31	31.67	869	0.79	1.26582	5.9	0.4	35.73	994	0.72	6	0.4	46	28	34.2	12.5
							95	18	162	69	26.2917	22	21	20	20	20	20	1540	0.44	369.1	2.132	0.232	13.73	222	1.03	0.970874	20.9	1.24	14.69	277	1.25	0.8	18.1	1.1	27.37	641	1.17	0.854701	8	0.53	32.85	823	0.79	5.1	0.35	33.4	28.7	35.1	9.1
							96	18	156	58	23.833	24	23	22	20	18	19	1390	0.38	215	1.881	0.181	14.47	258	0.99	1.0101	18.1	1.07	14.85	294	1.15	0.869565	17.4	1.07	29.13	766	0.85	1.17647	6.6	0.44	27	760	0.74	6	0.4	29.6	27	33	7.9
							97	22	161	67.5	26.0407	22	24	26	20	26	23	1250	0.37	183	1.827	0.17	15.76	277	1.19	0.840336	17.8	1.07	18.92	349	1.19	0.840336	15.2	0.94	32.94	805	0.88	1.13636	6.3	0.42	31.31	708	0.94	6.9	0.46	31.2	28.4	34.7	8.4
							98	25	157	54	21.9076	26	25	24	22	22	22	1028	0.37	161.4	1.831	0.171	15.88	298	1.19	0.840336	16	0.96	17.12	328	1.19	0.840336	15.1	0.92	30	718	0.79	1.26582	7.2	0.48	35.57	891	0.68	7.1	0.47	26.6	27	33	7.2
							99	20	157	72.5	29.413	20	23	26	20	20	20	1739	0.34	305.2	1.678	0.144	15.21	231	1.26	0.793651	19.3	1.12	15.3	306	1.54	0.649351	16.7	1.02	32.44	909	0.68	1.47059	5.6	0.39	32.81	900	0.88	7.5	0.49	30.4	27	33	8.2
							100	18	152	51	22.0741	20	19	18	22	18	20	1658	0.32	333.6	1.569	0.152	14.49	241	0.98	1.02041	18.6	1.09	16.8	303	1.15	0.869565	16.7	1.02	26.36	673	0.95	1.05263	7.6	0.5	27.33	690	0.99	5.5	0.37	27.6	25.3	30.9	7.4
							101	18	160	88.5	34.5703	36	35	34	36	30	33	2057	0.36	418.8	1.776	0.161	14.52	268	1.08	0.925926	17.3	1.03	16.45	338	1.11	0.900901	15.2	0.93	31.35	830	0.66	1.51515	6	0.4	29.22	739	0.71	5.5	0.38	37.4	28	34.2	10.2
							102	19	153	71.5	30.5438	26	24	22	20	22	21	1400	0.38	248.2	1.878	0.18	15.54	280	1.45	0.689655	18.6	1.14	17.37	299	1.78	0.561798	16.9	1.04	32.04	822	0.64	1.5625	6.3	0.42	32.32	902	0.65	7	0.46	31.2	25.6	31.4	8.5
							103	22	164	64.5	23.9813	18	18	18	20	14	17	1254	0.34	188.4	1.675	0.143	13.9	241	1.13	0.884956	18.6	1.08	16.01	320	1.15	0.869565	15.7	0.97	33.09	932	0.68	1.47059	5.4	0.37	36.17	1023	0.55	5.6	0.38	30.7	29.4	36	8.2
							104	18	160	63	24.6094	22	24	26	22	24	23	1315	0.36	259.3	1.776	0.161	13.68	229	1.19	0.840336	19.2	1.11	16.76	307	1.39	0.719424	15.9	0.97	28.51	697	0.94	1.06383	7.4	0.49	28.89	693	0.93	4.9	0.34	31.4	28	34.2	8.4
							105	19	159	88	34.8087	34	33	32	30	28	29	2058	0.35	421.6	1.726	0.152	14.01	214	1.4	0.714286	21.6	1.24	15.26	270	1.31	0.763359	19.1	1.15	37.08	1026	0.42	2.38095	4.7	0.33	32.25	909	0.59	7.2	0.48	36.3	27.7	33.9	9.7
							106	22	158	120.5	48.2695	30	28	26	24	22	23	1747	0.28	363.2	1.373	0.096	16.61	244	1.69	0.591716	21	1.27	16.41	255	1.78	0.561798	19.9	1.2	25.97	650	0.84	1.19048	8	0.52	33.12	854	0.86	5.5	0.37	41.9	27.4	33.4	11.3
							107	19	151	54.5	23.9025	22	20	18	16	16	16	1208	0.34	261.1	1.675	0.143	13.71	235	1.34	0.746269	19.3	1.09	14.48	258	1.3	0.769231	18.8	1.11	34.04	926	0.6	1.66667	5.5	0.38	31.15	738	0.72	5.8	0.39	23.4	24.9	30.5	6.3
							108	18	165	69.5	25.528	26	24	22	22	24	23	1355	0.32	196.5	1.576	0.127	12.83	200	1.18	0.847458	20.7	1.15	13.7	232	1.18	0.847458	20.1	1.18	31.26	765	0.83	1.20482	6.7	0.45	28.65	679	1.01	6.9	0.46	32.4	29.8	36.4	8.8
							109	23	152	103.5	44.7974	34	34	34	30	28	29	1732	0.31	461.9	1.525	0.119	14.11	206	1.29	0.775194	22.5	1.31	14.49	241	1.2	0.833333	19.4	1.13	26.84	730	0.94	1.06383	7	0.47	28.1	781	1	7.6	0.5	38	25.3	30.9	10.3
							110	18	159	55.5	21.9532	16	17	18	14	16	15	1045	0.32	182.5	1.573	0.126	16.25	296	1.34	0.746269	15.5	0.91	15.28	338	1.62	0.617284	14.7	0.9	34.32	905	0.6	1.66667	5.6	0.38	29.8	721	0.71	6.6	0.45	26.8	27.7	33.9	7.3
							111	19	159	77	30.4577	40	39	38	40	36	38	1650	0.39	329.8	1.932	0.19	16.39	309	1.03	0.970874	16.5	1.01	18.62	360	1.26	0.793651	14.4	0.89	32.03	834	0.58	1.72414	6.2	0.42	32.99	863	0.64	7	0.46	33.8	27.7	33.9	9.2
							112	18	158	68.5	27.4395	24	20	16	16	12	14	1242	0.29	118.6	1.424	0.103	13.66	204	1.18	0.847458	21.6	1.22	14.82	247	1.33	0.75188	19.9	1.18	26.64	642	0.86	1.16279	8.1	0.53	26.06	686	0.96	6	0.41	32.3	27.7	33.9	8.8
							113	22	160	88.5	34.5703	18	23	28	24	24	24	1365	0.28	306.8	1.37	0.096	12.45	178	1.32	0.757576	22.7	1.24	13.61	236	1.3	0.769231	19.3	1.11	33.6	976	0.53	1.88679	5.2	0.36	30.42	782	0.88	6.6	0.44	33.1	28	34.2	8.9
							114	19	161	62	23.9188	24	27	30	26	26	26	1294	0.4	300.6	1.979	0.2	12.87	209	1.38	0.724638	21.8	1.27	15.37	274	1.5	0.666667	18	1.09	29.4	719	0.85	1.17647	7.2	0.48	30.54	761	0.75	6.5	0.44	28.3	28.4	34.7	7.6
							115	19	161	59.5	22.9544	22	22	22	22	16	19	774	0.46	490.6	2.237	0.255	14.29	223	1.1	0.909091	19.2	1.08	15.94	258	1.29	0.775194	18.4	1.1	29.35	689	0.95	1.05263	7.3	0.48	30.71	769	0.68	7.1	0.47	30	28.4	34.7	8.1
							116	19	152	82.5	35.7081	28	27	26	22	20	21	1483	0.3	229.3	1.675	0.143	13.26	198	1.14	0.877193	21.2	1.17	14.7	259	1.19	0.840336	18.9	1.13	30.74	812	0.85	1.17647	6.2	0.41	29.59	757	0.96	6.6	0.44	30.6	25.3	30.9	8.2
							117	18	163	79.5	29.9221	32	30	28	28	22	25	1443	0.32	205.2	1.573	0.126	15.57	275	1.2	0.833333	17.9	1.08	16.73	289	1.26	0.793651	17.3	1.05	26.24	656	0.93	1.07527	8.1	0.53	29.21	732	0.87	6.9	0.46	35.1	29.1	35.5	9.4
							118	20	159	62.5	24.7221	24	25	26	24	22	23	1198	0.41	209	2.03	0.21	16.22	293	1.1	0.909091	16.8	1.01	16.32	341	1.33	0.75188	15.1	0.93	31.19	760	0.87	1.14943	6.7	0.45	31.67	787	0.92	7	0.46	29.4	27.7	33.9	7.9
							119	28	157	90.5	36.7155	32	32	32	34	32	33	1770	0.34	253.9	1.675	0.143	14.71	264	1.15	0.869565	19.1	1.14	15.76	273	1.18	0.847458	18.8	1.12	22.01	647	1.04	0.961538	8.3	0.55	29.68	831	0.72	6.5	0.43	36.6	27	33	10
							120	21	152	51.5	22.2905	18	15	12	14	12	13	1128	0.33	209.8	1.627	0.135	14.68	298	1.67	0.598802	16.6	1.01	16.52	283	1.7	0.588235	17.5	1.06	32.35	707	1.06	0.943396	7	0.46	28.39	636	0.95	6.1	0.42	22.6	25.3	30.9	6.1
							121	25	157	62	25.1532	18	17	16	20	14	17	1190	0.33	207.7	1.624	0.135	13.89	222	1.19	0.840336	21.4	1.26	12.91	242	1.36	0.735294	20.1	1.18	33.54	882	0.76	1.31579	5.6	0.38	26.31	745	0.86	8.1	0.53	27.6	27	33	7.5
							122	30	170	107	37.0242	14	18	22	24	4	14	1705	0.28	148.8	1.373	0.096	13.9	196	1.27	0.787402	25.4	1.51	14.28	219	1.51	0.662252	22.3	1.32	29.05	791	0.79	1.26582	6.4	0.43	29.24	797	0.86	6	0.4	40.3	31.7	38.7	10.7
							123	20	168	69	24.4473	18	16	14	18	14	16	1233	0.37	202.1	1.827	0.17	17.4	323	1.23	0.813008	15.6	0.94	18.66	344	1.45	0.689655	15.3	0.95	32.39	846	0.76	1.31579	5.9	0.39	32.39	836	0.79	7	0.47	32.9	30.9	37.7	9
							124	18	174	94	31.0477	22	22	22	16	20	18	983	0.25	448.8	1.218	0.076	14.2	241	1.22	0.819672	20.5	1.21	15.56	277	1.4	0.714286	18.4	1.11	32.64	903	0.78	1.28205	5.6	0.38	33.51	964	0.45	6.4	0.44	42.7	33.1	40.5	11.6
							125	18	162	54.5	20.7667	28	30	32	30	30	30	966	0.35	155.5	1.729	0.152	14.9	268	1.27	0.787402	17.9	1.08	16.73	280	1.24	0.806452	17.4	1.05	30.67	766	1.05	0.952381	6.5	0.43	31.34	794	1.04	5.3	0.36	26.9	27.4	33.4	7.2
							126	20	163	75.5	28.4166	30	30	30	30	26	28	1635	0.35	250.7	1.726	0.152	13.9	244	1.37	0.729927	19.4	1.14	17.08	298	1.45	0.689655	17.1	1.05	31.84	757	0.83	1.20482	6.6	0.44	32.81	803	0.82	6.3	0.42	34.6	29.1	35.5	9.4
							127	18	158	50.5	20.2291	20	16	12	14	14	14	1225	0.39	256.9	1.932	0.19	15.92	223	1.41	0.70922	20.4	1.19	14.38	255	1.06	0.943396	19	1.14	30.39	754	0.89	1.1236	6.7	0.45	29.05	708	0.8	6.4	0.43	26.1	27.4	33.4	7
							128	18	167	59.5	21.3346	22	20	18	22	20	21	1224	0.37	237.7	1.827	0.17	13.93	230	1.05	0.952381	20.1	1.16	15.47	279	1.26	0.793651	18	1.09	33.35	838	0.84	1.19048	6.1	0.41	33.26	860	0.85	7.4	0.49	30.5	30.5	37.3	8.2
							129	19	155	57	23.7253	26	27	28	24	22	23	1326	0.37	273.9	1.831	0.171	15.46	275	1.06	0.943396	17	0.99	16.03	311	1.1	0.909091	16	0.97	26.05	635	0.79	1.26582	8	0.52	29.33	758	0.77	5.9	0.4	27.2	26.3	32.1	7.4
							130	19	160	68.5	26.7578	20	20	20	16	16	16	1389	0.34	219.2	1.675	0.143	14.86	257	1.01	0.990099	18	1.06	17.46	338	1.09	0.917431	15.3	0.95	28.46	723	0.69	1.44928	7	0.46	39.07	1118	0.28	6.7	0.44	30.7	28	34.2	8.3
							131	20	159	80.5	31.8421	20	21	22	22	28	25	1560	0.33	261.6	1.627	0.135	14.31	240	1.12	0.892857	19.7	1.16	16.61	290	1.23	0.813008	17.8	1.09	32.66	913	0.61	1.63934	5.6	0.38	32.95	856	0.66	6.4	0.43	32.6	27.7	33.9	8.8
							132	18	160	81	31.6406	18	18	18	18	18	18	1470	0.31	185.3	1.525	0.119	14.13	223	1.45	0.689655	21.5	1.27	12.39	220	1.57	0.636943	21.8	1.29	28.72	758	0.78	1.28205	6.6	0.44	30.16	794	0.74	6	0.4	31.6	28	34.2	8.5
							133	19	160	52	20.3125	20	20	20	20	18	19	1340	0.36	316.8	1.776	0.161	16.91	275	1.01	0.990099	17.2	1.03	17.78	295	1.28	0.78125	17.2	1.05	31.41	781	0.76	1.31579	6.4	0.42	31.96	793	0.74	4.2	0.3	26.6	28	34.2	7.1
							134	19	158	71	28.441	28	25	22	26	20	23	1665	0.32	283.3	1.576	0.127	14.28	239	1.13	0.884956	20.4	1.22	15.92	271	1.22	0.819672	18.7	1.14	39.84	1113	0.39	2.5641	4.4	0.31	31.26	771	0.88	6.1	0.41	31.6	27.4	33.4	8.5
							135	18	159	57.5	22.7444	28	24	20	26	22	24	1282	0.38	285.3	1.878	0.18	14.31	252	1.27	0.787402	18.5	1.09	14.9	258	1.2	0.833333	19	1.13	27.76	657	1.17	0.854701	7.7	0.51	29.4	719	1.01	6.6	0.44	28.3	27.7	33.9	7.5
							136	21	160	60	23.4375	24	24	24	22	20	21	1072	0.4	218.6	1.983	0.201	13.65	219	1.18	0.847458	21.3	1.26	14.61	255	1.29	0.775194	19	1.13	32.49	877	0.47	2.12766	5.8	0.39	30.57	754	0.67	7.1	0.47	30.6	28	34.2	8.2
							137	20	163	76	28.6048	26	24	22	20	18	19	1500	0.35	260.6	1.729	0.152	13.7	218	1.08	0.925926	20.9	1.21	15.05	288	1.13	0.884956	17.5	1.05	33.58	931	0.53	1.88679	5.5	0.38	30.38	759	0.79	6.7	0.44	32.5	29.1	35.5	8.8
							138	20	158	58.5	23.4337	12	12	12	8	8	8	870	0.39	400.5	1.929	0.19	13.43	235	1.27	0.787402	20.4	1.19	15.36	298	1.41	0.70922	17.2	1.05	33.8	813	0.77	1.2987	6.1	0.41	30.51	721	0.82	6.7	0.45	27.3	27.4	33.4	7.3
							139	19	166	47	17.0562	20	21	22	18	18	18	634	0.45	420.2	1.862	0.18	15.25	273	1.13	0.884956	17.7	1.06	18.74	307	1.62	0.617284	16.6	1.02	31.48	734	0.87	1.14943	6.9	0.45	31.48	760	0.67	7.1	0.47	25.7	30.1	36.8	6.9
							140	20	155	71.5	29.7607	24	22	20	20	22	21	1452	0.3	165	1.472	0.111	15.72	286	1.18	0.847458	17.4	1.07	16.2	341	1.51	0.662252	15.6	0.97	28.94	696	0.75	1.33333	7.3	0.48	31.64	829	0.66	6.8	0.45	30.4	26.3	32.1	8.1
							141	20	173	74	24.7252	28	28	28	26	25	25.5	1350	0.32	153	1.573	0.126	15.69	265	1.45	0.689655	19.2	1.17	18.59	298	2.1	0.47619	16.5	1.02	31.66	807	0.88	1.13636	6.2	0.42	32.25	788	0.9	6.2	0.42	35.7	32.8	40	9.5
							142	18	162	66.5	25.3391	20	20	20	18	18	18	1462	0.3	203	1.472	0.111	13.75	246	1.54	0.649351	19.9	1.18	14.23	265	1.27	0.787402	19.1	1.15	29.01	709	0.87	1.14943	7.3	0.48	27.19	637	1.02	6.2	0.42	30.7	28.7	35.1	8.2
[truncated: 77 more columns]
